# Supplementary material
Source: MDPI journal article supplement (https://www.mdpi.com/2073-4441/15/9/1664)
Supplement: s1 [file s1 › water-2255037-supplementary.pdf]

### Supplementary Figure

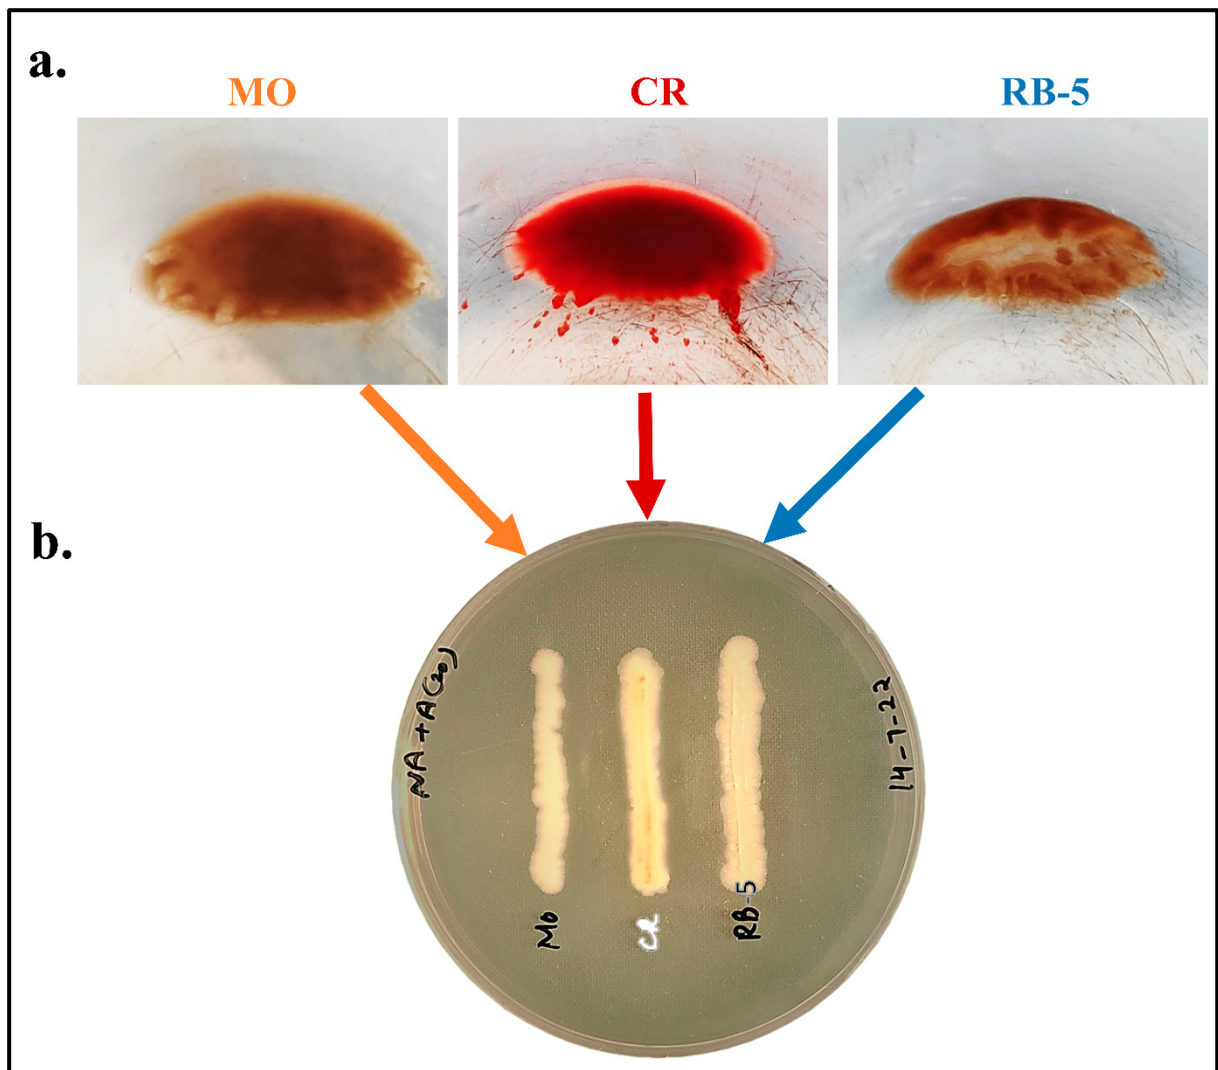

Figure S1

**JAS1 pellet post in-solution dye degradation.** In (a), except CR which retained its color on the bacterial pellet, MO and RB-5 could not show any colored pellet (following from Figure 1b in the manuscript). (b), JAS1 inoculum from these pellets could easily regrow as streaks over NA.
